# Supplementary material
Source: publisher figshare collection journal article supplement (https://acs.figshare.com/ndownloader/files/8400977)
Supplement: Supplementary file 1 [file 8400977]

# Evidencing Fast, Massive and Reversible H<sup>+</sup>- Insertion in Nanostructured TiO<sub>2</sub> Electrodes at Neutral pH. Where Do Protons Come From?

*Yee-Seul Kim,<sup>†</sup> Sébastien Kriegel,<sup>†</sup> Kenneth D. Harris,<sup>#,§</sup> Cyrille Costentin,<sup>†</sup>*

*Benoît Limoges<sup>†,\*</sup> and Véronique Balland<sup>†,\*</sup>*

<sup>†</sup> Laboratoire d'Electrochimie Moléculaire, UMR CNRS 7591, Université Paris Diderot,  
Sorbonne Paris Cité, 15 rue Jean-Antoine de Baïf, F-75205 Paris Cedex 13, France

<sup>#</sup> NRC National Institute for Nanotechnology, Edmonton, Alberta, Canada T6G 2M9 and  
Department of Mechanical Engineering, University of Alberta, Edmonton, Alberta, Canada  
T6G 2V4 .

<sup>§</sup> Leibniz-Institute für Polymerforschung Dresden, 01069 Dresden, Germany

Email: [veronique.balland@univ-paris-diderot.fr](mailto:veronique.balland@univ-paris-diderot.fr)  
[limoges@univ-paris-diderot.fr](mailto:limoges@univ-paris-diderot.fr)

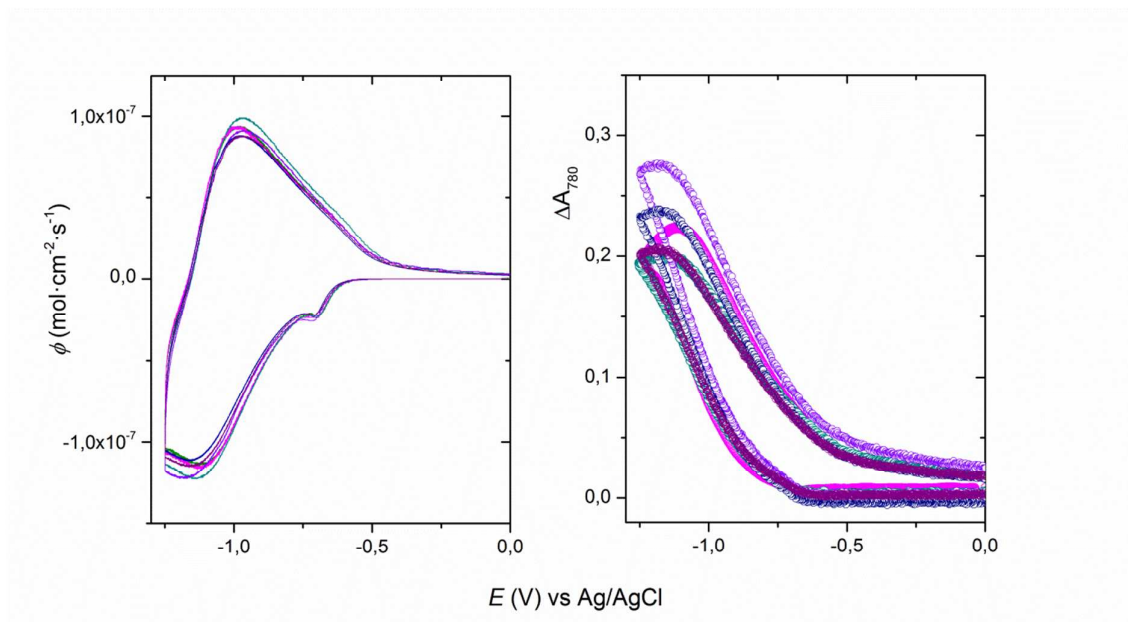

**Figure S1.** (Left) CVs and (right) CVAs ( $\lambda = 780$  nm) recorded at 7 different 1  $\mu\text{m}$ -thick GLAD-TiO<sub>2</sub> electrodes (arising from 2 different GLAD deposition batches) in 0.1 M HEPES (pH 7.0) and 0.3 M KCl. Each color denotes a simultaneously recorded CV/CVA pair. Scan rate: 0.1 V·s<sup>-1</sup>.  $T = 25^\circ\text{C}$ .

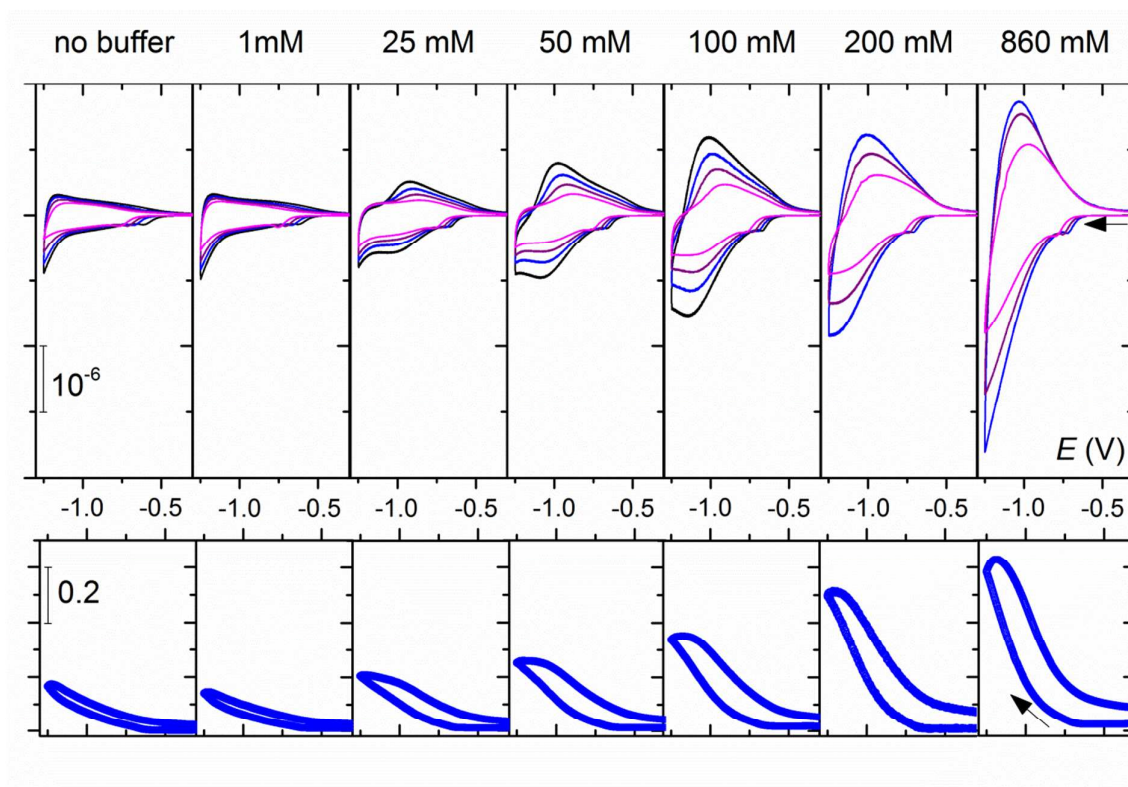

**Figure S2.** Top: CVs recorded at 1  $\mu\text{m}$ -thick GLAD-TiO<sub>2</sub> electrodes in aqueous solutions of 0.3 M KCl complemented with increasing concentration of HEPES buffer (pH 7.0). Buffer concentrations  $C_B$  are reported on top of the graphs, and currents are converted to electron flux density normalized to the scan rate. The ordinate is  $\phi/\nu = i/FS\nu$  with units  $\text{mol}\cdot\text{V}^{-1}\cdot\text{cm}^{-2}$ . Scan rates: 0.05  $\text{V}\cdot\text{s}^{-1}$  (black), 0.1  $\text{V}\cdot\text{s}^{-1}$  (blue), 0.2  $\text{V}\cdot\text{s}^{-1}$  (purple) and 0.5  $\text{V}\cdot\text{s}^{-1}$  (magenta). Bottom: CVAs ( $\lambda = 780 \text{ nm}$ ) recorded during the 0.1  $\text{V}\cdot\text{s}^{-1}$  CV scans. The ordinate is in absorbance units. The abscissa for both the CVs and CVAs are potential (V) with respect to the Ag/AgCl (3 M KCl) reference electrode.  $T = 25^\circ\text{C}$ .

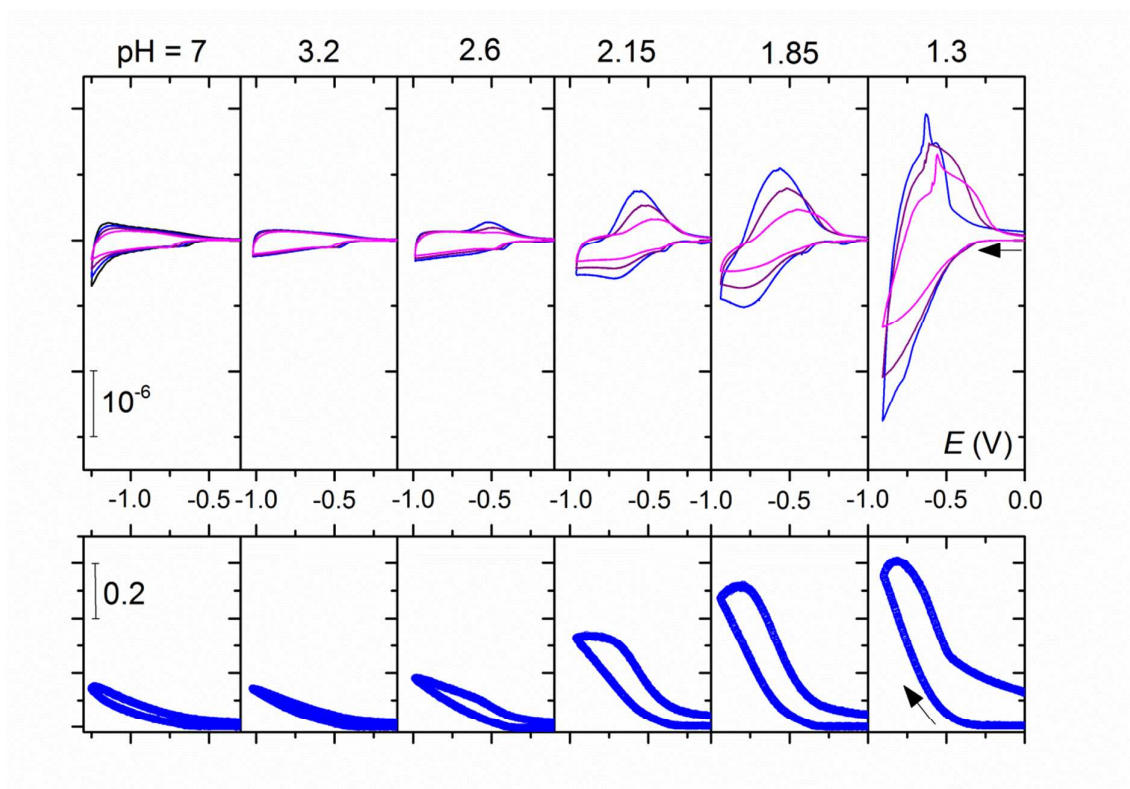

**Figure S3.** Top: CVs recorded at  $1 \mu\text{m}$ -thick GLAD- $\text{TiO}_2$  electrodes immersed in increasingly acidic aqueous solutions (pHs are reported above the graphs). Currents are converted to electron flux density normalized to the scan rate. The ordinate is  $\phi/v = i/FSv$  with units  $\text{mol} \cdot \text{V}^{-1} \cdot \text{cm}^{-2}$ . Scan rates:  $0.05 \text{ V} \cdot \text{s}^{-1}$  (black),  $0.1 \text{ V} \cdot \text{s}^{-1}$  (blue),  $0.2 \text{ V} \cdot \text{s}^{-1}$  (purple) and  $0.5 \text{ V} \cdot \text{s}^{-1}$  (magenta). Bottom: CVAs ( $\lambda = 780 \text{ nm}$ ) recorded simultaneously to the CVs (only experiments conducted at  $0.1 \text{ V} \cdot \text{s}^{-1}$  are shown). The ordinate is in absorbance units. The abscissa for both the CVs and CVAs are potential (V) with respect to the Ag/AgCl (3 M KCl) reference electrode.  $T = 25^\circ\text{C}$ .

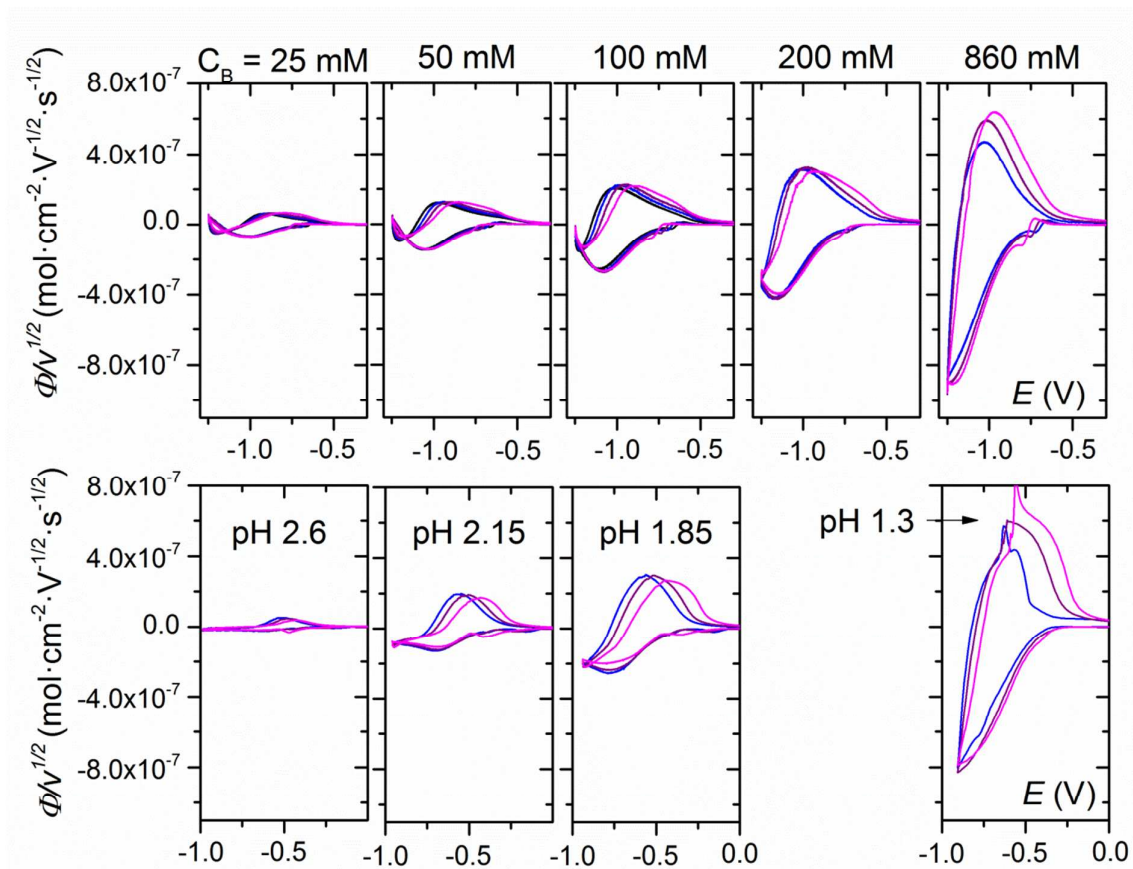

**Figure S4.** Top: CVs previously presented in Figure S2 with correction to remove the capacitive contribution to the total current (i.e., by subtracting the CVs recorded in 0.3 M KCl without buffer). Bottom: CVs previously presented in Figure S3 with correction to remove the capacitive contribution to the total current (i.e., by subtracting the CVs recorded in 0.3 M KCl). Currents were all converted to electron flux density normalized to the square root of scan rate. Scan rates: 0.05 V·s<sup>-1</sup> (black), 0.1 V·s<sup>-1</sup> (blue), 0.2 V·s<sup>-1</sup> (purple) and 0.5 V·s<sup>-1</sup> (magenta). The abscissa are potential (V) with respect to the Ag/AgCl (3 M KCl) reference electrode.  $T = 25^\circ\text{C}$ .

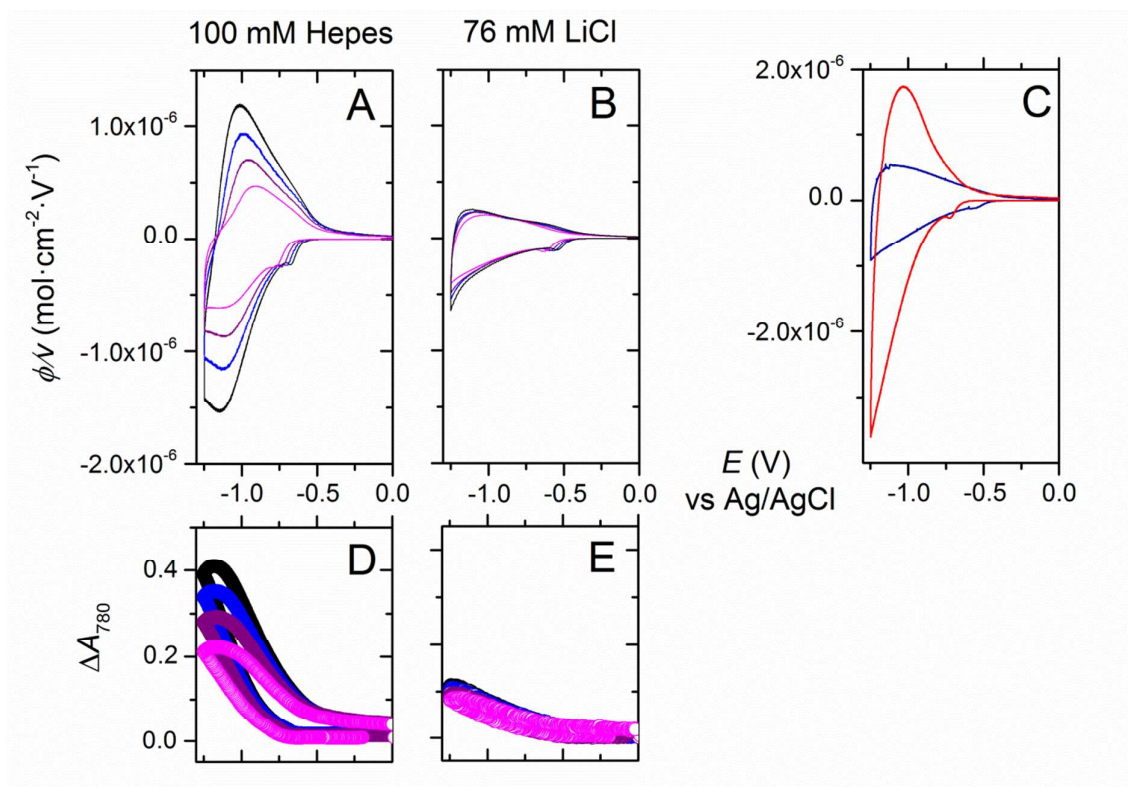

**Figure S5.** (A,B) CVs recorded at 1  $\mu\text{m}$ -thick GLAD-TiO<sub>2</sub> electrodes immersed in aqueous solutions containing 0.3 M KCl and (A) 76 mM acidic form of HEPES (i.e. 0.1 M HEPES buffer, pH 7.0) and (B) 76 mM LiCl. Scan rates: 0.05 V·s<sup>-1</sup> (black), 0.1 V·s<sup>-1</sup> (blue), 0.2 V·s<sup>-1</sup> (purple) and 0.5 V·s<sup>-1</sup> (magenta). (C) Same as (A,B) but with 0.3 M KCl and (red) 0.66 M acidic form of HEPES (0.66 M AH in 0.86 M HEPES, pH 7.0) or (dark blue) 1 M LiCl, both recorded at a scan rate of 0.1 V·s<sup>-1</sup>. (D,E) CVAs ( $\lambda = 780$  nm) recorded during the corresponding CV scans in (A,B).  $T = 25^\circ\text{C}$ .



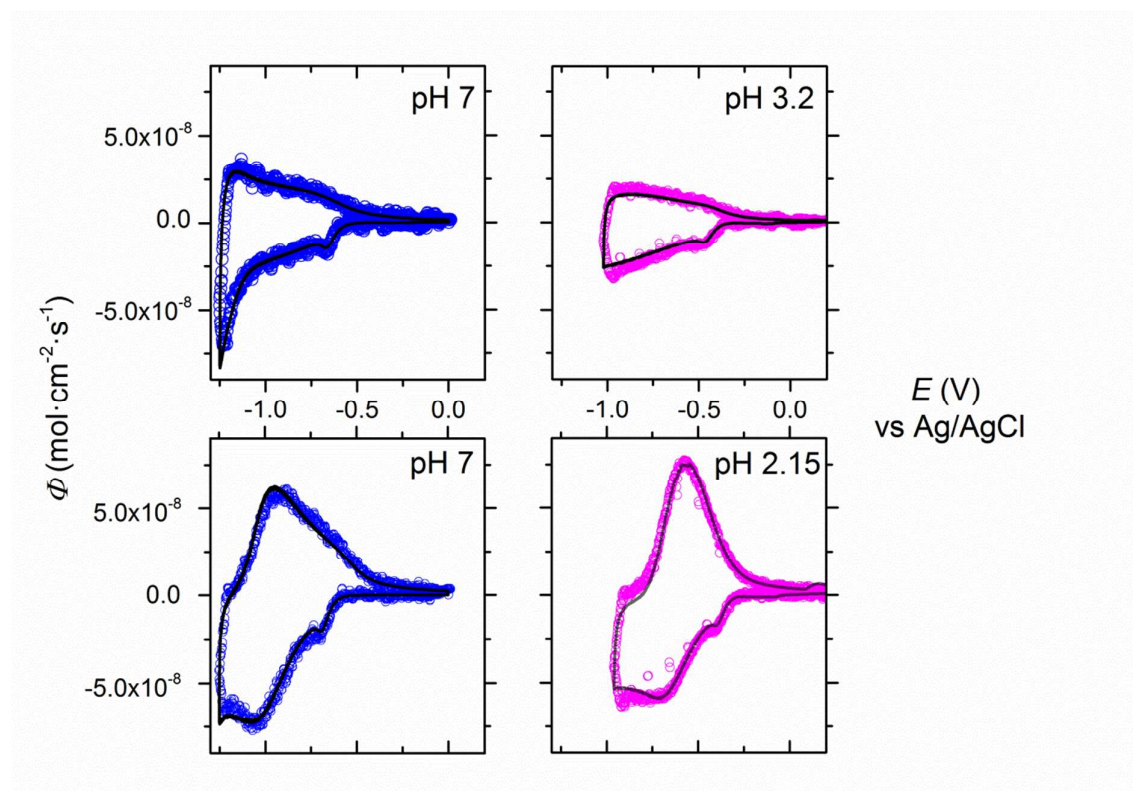

**Figure S6.** CVs (black line) and DCVAs (circles) expressed in flux density and recorded at (left) neutral pH in the presence of (top) 1 mM or (bottom) 50 mM HEPES, or (right) acidic pHs. The optimized overlay of DCVAs and CVs was obtained by adjusting the  $\epsilon_{780}$  value to (blue)  $800 \text{ M}^{-1}\cdot\text{cm}^{-1}$  and (magenta)  $1200 \text{ M}^{-1}\cdot\text{cm}^{-1}$ . All experiments were conducted in the presence of 0.3 M KCl at a scan rate of  $0.1 \text{ V}\cdot\text{s}^{-1}$ .  $T = 25^\circ\text{C}$ .

**Table S1.** Features of CVs and CVAs shown in Figure 2.

|                                                      |       |       |        |
|------------------------------------------------------|-------|-------|--------|
| pH                                                   | 1.85  | 7     | 7      |
| [H <sub>3</sub> O <sup>+</sup> ] (mM)                | 14    | ~0    | ~0     |
| [AH] (mM)                                            | -     | 0     | 77     |
| $E_{onset}$ (V) <sup>a</sup>                         | -0.30 | -0.60 | -0.60  |
| $E^0$ (V) <sup>b</sup>                               | -0.68 | -     | - 1.06 |
| $\Delta E_p$ (mV)                                    | 220   | -     | 120    |
| $\Delta A_{780}^{max}$                               | 0.51  | 0.15  | 0.34   |
| $\epsilon_{780}$ (M <sup>-1</sup> cm <sup>-1</sup> ) | 1200  | 800   | 800    |

<sup>a</sup> Potential that characterize the onset increase of absorbance measured at 780 nm.

<sup>b</sup> Formal potential obtained from the average of cathodic and anodic peak potentials at the slowest scan rate.
